CORRECTION

# Correction: The Effect of Female Quality on Male Ejaculatory Expenditure and Reproductive Success in a Praying Mantid

Anuradhi Jayaweera, Katherine L. Barry

The Funding section is incorrect. The complete, correct Funding statement is: The Joyce W. Vickery Scientific Research Fund from the Linnean Society of NSW (<http://linneansocietynsw.org.au/grants.html>) funded this research. The funder had no role in study design, data collection and analysis, decision to publish, or preparation of the manuscript.

## Reference

1. Jayaweera A, Barry KL (2015) The Effect of Female Quality on Male Ejaculatory Expenditure and Reproductive Success in a Praying Mantid. PLoS ONE 10(5): e0124209. doi:[10.1371/journal.pone.0124209](https://doi.org/10.1371/journal.pone.0124209) PMID: [25970459](https://pubmed.ncbi.nlm.nih.gov/25970459/)

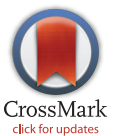

## OPEN ACCESS

**Citation:** Jayaweera A, Barry KL (2015) Correction: The Effect of Female Quality on Male Ejaculatory Expenditure and Reproductive Success in a Praying Mantid. PLoS ONE 10(9): e0137814. doi:[10.1371/journal.pone.0137814](https://doi.org/10.1371/journal.pone.0137814)

**Published:** September 2, 2015

**Copyright:** © 2015 Jayaweera, Barry. This is an open access article distributed under the terms of the [Creative Commons Attribution License](https://creativecommons.org/licenses/by/4.0/), which permits unrestricted use, distribution, and reproduction in any medium, provided the original author and source are credited.
